# Supplementary material
Source: ML conference proceedings conference paper supplement (https://proceedings.mlr.press/v37/johnson15.html)
Supplement: Supplementary file 1 [file johnson15-supp.zip]

We organize the appendices as follows:

- **Appendix A:** Proof of Theorem 2.1
- **Appendix B:** Proof of Corollary 2.2
- **Appendix C:** Alternative Proof and Generalized Version of Corollary 2.3
- **Appendix D:** Proof of Theorem 3.3
- **Appendix E:** Derivation of Dual Problem for  $\ell_1$ -Regularized Loss Minimization
- **Appendix F:** Examples of Computing  $\text{dist}(h_j, \mathbf{y})$
- **Appendix G:** Remarks on Computing  $\alpha$

## A. Proof of Theorem 2.1

**Theorem 2.1** (Convergence Progress at Iteration  $t$ ). *Let  $\Delta_t$  and  $\Delta_{t+1}$  be the optimality gaps after iterations  $t$  and  $t+1$  of Algorithm 2. Then for all  $t \geq 1$  if the algorithm does not converge at iteration  $t+1$ , we have*

$$\Delta_{t+1} \leq \Delta_t - \left(\frac{\gamma}{2} \tau_t^2 \Delta_t^2\right)^{1/3}. \quad (6)$$

*Proof.* Note: throughout this proof, we use  $\alpha$  to refer to  $\alpha_{t+1}$  in order to simplify notation.

When  $\alpha = 1$ , we have

$$\Delta_{t+1} = f(\mathbf{y}_{t+1}) - f(\mathbf{x}_{t+1}) \quad (24)$$

$$= f(\mathbf{x}_t) - f(\mathbf{x}_{t+1}) \quad (25)$$

$$\leq 0. \quad (26)$$

This is because  $\mathcal{C}_{t+1}$  includes all constraints active at  $\mathbf{x}_t$ , ensuring  $f(\mathbf{x}_{t+1}) \geq f(\mathbf{x}_t)$ . Thus, when  $\alpha = 1$ , the algorithm converges at iteration  $t+1$ , and the theorem holds.

To consider the case  $\alpha < 1$ , we begin by writing

$$\Delta_{t+1} = f(\mathbf{y}_{t+1}) - f(\mathbf{x}_{t+1}) \quad (27)$$

$$= [f(\mathbf{y}_{t+1}) - f(\mathbf{x}_t)] + [f(\mathbf{x}_t) - f(\mathbf{x}_{t+1})]. \quad (28)$$

Our approach is to bound these terms as functions of  $\Delta_t$ ,  $\tau_t$ , and  $\alpha$ . We will eliminate  $\alpha$  from this result by bounding over all  $\alpha \in [0, 1]$ .

**Bounding First Term in (28):** Because  $f$  is strongly convex with parameter  $\gamma$ , we can write

$$f(\mathbf{y}_{t+1}) = f(\alpha \mathbf{x}_t + (1 - \alpha) \mathbf{y}_t) \quad (29)$$

$$\leq \alpha f(\mathbf{x}_t) + (1 - \alpha) f(\mathbf{y}_t) - \alpha(1 - \alpha) \frac{\gamma}{2} \|\mathbf{x}_t - \mathbf{y}_t\|_2^2. \quad (30)$$

This implies

$$f(\mathbf{y}_{t+1}) - f(\mathbf{x}_t) \leq (1 - \alpha) [f(\mathbf{y}_t) - f(\mathbf{x}_t)] - \alpha(1 - \alpha) \frac{\gamma}{2} \|\mathbf{x}_t - \mathbf{y}_t\|_2^2 \quad (31)$$

$$= (1 - \alpha) \Delta_t - \alpha(1 - \alpha) \frac{\gamma}{2} \|\mathbf{x}_t - \mathbf{y}_t\|_2^2. \quad (32)$$

Furthermore, since  $\mathbf{y}_{t+1} = \alpha \mathbf{x}_t + (1 - \alpha) \mathbf{y}_t$ , we have

$$\alpha(1 - \alpha) \frac{\gamma}{2} \|\mathbf{x}_t - \mathbf{y}_t\|_2^2 = \alpha(1 - \alpha) \frac{\gamma}{2} \left[ \frac{\|\mathbf{y}_{t+1} - \mathbf{y}_t\|_2^2}{\alpha^2} \right] \quad (33)$$

$$\geq \frac{(1 - \alpha)}{\alpha} \frac{\gamma}{2} \tau_t^2. \quad (34)$$

Above, the inequality is true because  $\alpha < 1$  implies  $\|\mathbf{y}_{t+1} - \mathbf{y}_t\|_2 \geq \tau_t$ ; there exists an  $h_j \notin \mathcal{C}_t$  such that  $h_j(\mathbf{y}_{t+1}) = 0$ , but since  $h_j \notin \mathcal{C}_t$ , no point on the boundary of  $h_j$ — $\mathbf{y}_{t+1}$  included—may be within a radius  $\tau_t$  of  $\mathbf{y}_t$ .

Combining (32) and (34), we have

$$f(\mathbf{y}_{t+1}) - f(\mathbf{x}_t) \leq (1 - \alpha)\Delta_t - \frac{(1 - \alpha)}{\alpha} \frac{\gamma}{2} \tau_t^2. \quad (35)$$

**Bounding the Second Term in (28):** To bound the second term for the case that  $\alpha < 1$ , let  $h_j$  be the (possibly non-unique) constraint such that  $h_j(\mathbf{y}_{t+1}) = 0$  and  $h_j(\mathbf{x}_t) > 0$ , and recall the definition

$$\text{dist}(h_j, \mathbf{x}_t) = \inf_{\mathbf{z} : h_j(\mathbf{z}) = 0} \|\mathbf{z} - \mathbf{x}_t\|_2. \quad (36)$$

Because  $h(\mathbf{y}_{t+1}) = 0$ , the set  $\{\mathbf{z} : h_j(\mathbf{z}) = 0\}$  is non-empty, and we can define  $\mathbf{z}_t$  as a value of  $\mathbf{z}$  that minimizes  $\|\mathbf{z} - \mathbf{x}_t\|_2$  over this set. We have

$$\text{dist}(h_j, \mathbf{x}_t) = \|\mathbf{z}_t - \mathbf{x}_t\|_2 \quad (37)$$

$$= \left\| \mathbf{z}_t - \frac{1}{\alpha} (\mathbf{y}_{t+1} - (1 - \alpha)\mathbf{y}_t) \right\|_2 \quad (38)$$

$$= \frac{1 - \alpha}{\alpha} \left\| \frac{-\alpha}{1 - \alpha} \mathbf{z}_t + \frac{1}{1 - \alpha} \mathbf{y}_{t+1} - \mathbf{y}_t \right\|_2 \quad (39)$$

$$\geq \frac{1 - \alpha}{\alpha} \tau_t. \quad (40)$$

The last step is due to the convexity of  $h_j$  and the fact that  $h_j \notin \mathcal{C}_t$  (otherwise we could not have  $h_j(\mathbf{x}_t) > 0$  since  $\mathbf{x}_t$  is feasible for all constraints in  $\mathcal{C}_t$ ). Applying convexity of  $h_j$ , we have

$$h_j \left( \frac{-\alpha}{1 - \alpha} \mathbf{z}_t + \frac{1}{1 - \alpha} \mathbf{y}_{t+1} \right) \geq 0, \quad (41)$$

since  $h_j(\mathbf{z}_t) = h_j(\mathbf{y}_{t+1}) = 0$ , and  $\frac{-\alpha}{1 - \alpha} + \frac{1}{1 - \alpha} = 1$  with the first term being negative. The fact that this affine combination of  $\mathbf{z}_t$  and  $\mathbf{y}_{t+1}$  violates (or is tight at)  $h_j$  while  $\mathbf{y}_t$  is feasible for  $h_j$  implies (40) since  $\mathbf{y}_t$  is at least a distance  $\tau_t$  from the boundary  $\{\mathbf{z} : h_j(\mathbf{z}) = 0\}$  (since  $h_j \notin \mathcal{C}_t$ ).

We can use our bound on  $\text{dist}(h_j, \mathbf{x}_t)$  to bound  $f(\mathbf{x}_t) - f(\mathbf{x}_{t+1})$ .

$$f(\mathbf{x}_t) - f(\mathbf{x}_{t+1}) \leq -(\mathbf{x}_{t+1} - \mathbf{x}_t)^T \nabla f(\mathbf{x}_t) - \frac{\gamma}{2} \|\mathbf{x}_{t+1} - \mathbf{x}_t\|_2^2 \quad (42)$$

$$\leq -\frac{\gamma}{2} \|\mathbf{x}_{t+1} - \mathbf{x}_t\|_2^2 \quad (43)$$

$$\leq -\frac{\gamma}{2} \text{dist}(h_j, \mathbf{x}_t)^2 \quad (44)$$

$$\leq -\frac{\gamma}{2} \frac{(1 - \alpha)^2}{\alpha^2} \tau_t^2. \quad (45)$$

Above the first inequality results from strong convexity. The second inequality requires an optimality conditions argument. In particular  $\mathbf{x}_t$  minimizes  $f$  subject to constraints  $\{h_j : h_j(\mathbf{x}_t) = 0\}$ , while  $\mathbf{x}_{t+1}$  minimizes  $f$  subject to a superset of these constraints. This means  $\mathbf{x}_{t+1}$  is feasible for the first problem and  $(\mathbf{x}_{t+1} - \mathbf{x}_t)^T \nabla f(\mathbf{x}_t) \geq 0$ . Finally, the third inequality results from the fact that  $\mathbf{x}_{t+1}$  cannot violate  $h_j$ .

**Completing the Proof:** Adding (35) and (45), we have

$$\Delta_{t+1} \leq (1 - \alpha) \Delta_t - \frac{(1 - \alpha)}{\alpha} \frac{\gamma}{2} \tau_t^2 - \frac{(1 - \alpha)^2}{\alpha^2} \frac{\gamma}{2} \tau_t^2 \quad (46)$$

$$= (1 - \alpha) \Delta_t - \frac{1 - \alpha}{\alpha^2} \frac{\gamma}{2} \tau_t^2 \quad (47)$$

$$= (1 - \alpha) \left( \Delta_t - \frac{1}{\alpha^2} \frac{\gamma}{2} \tau_t^2 \right). \quad (48)$$

It is worth noting that this partial result formalizes the main intuition for BLITZ. When  $\alpha$  is close to 1,  $\mathbf{y}_t$  becomes close to  $\mathbf{x}_{t-1}$  and the resulting suboptimality gap becomes small (via the left part of (48)). At the same time, if  $\alpha$  is close to 0,

there must exist an  $h_j$  that is substantially violated by  $\mathbf{x}_{t-1}$ . As a result,  $f(\mathbf{x}_t)$  improves significantly from  $f(\mathbf{x}_{t-1})$  and the resulting suboptimality gap again becomes small (this time via the right side of (48)).

We complete our proof by bounding (48) over all  $\alpha \in [0, 1]$ . A relatively simple bound is the following:

$$\Delta_{t+1} \leq \Delta_t - \left(\frac{\gamma}{2} \tau_t^2 \Delta_t^2\right)^{1/3}. \quad (49)$$

This can be obtained by solving for  $\alpha$  in

$$\alpha \Delta_t = \frac{1}{\alpha^2} \frac{\gamma}{2} \tau_t^2 \quad (50)$$

and then writing  $\Delta_{t+1} \leq (1 - \alpha') \Delta_t$  where  $\alpha'$  is the solution from above.

□

## B. Proof of Corollary 2.2

**Corollary 2.2** (Linear Convergence). *For  $t \geq 1$ , define*

$$\Delta'_t = f(\mathbf{y}_t) - f(\mathbf{x}_{t-1}), \quad (7)$$

*and suppose we run Algorithm 2 choosing  $\tau_t$  as*

$$\tau_t = \sqrt{\frac{2}{\gamma} (1-r)^3 \Delta'_t} \quad (8)$$

*for some  $r \in [0, 1)$ . Then for  $t \geq 1$ , we have*

$$f(\mathbf{y}_t) - f(\mathbf{x}^*) \leq r^{t-1} \Delta_0. \quad (9)$$

*Proof.* The proof is a direct application of Theorem 2.1. However, since  $\Delta_t$  is not known when selecting  $\tau_t$ , we instead use  $\Delta'_t$  to upper-bound  $\Delta_t$ . (To see that  $\Delta'_t$  upper-bounds  $\Delta_t$ , note that since all constraints that are tight at  $\mathbf{x}_{t-1}$  are included in the working set at iteration  $t$ , we have  $f(\mathbf{x}_t) \geq f(\mathbf{x}_{t-1})$ . Plugging into the definitions of  $\Delta_t$  and  $\Delta'_t$ , we have  $\Delta'_t \geq \Delta_t$ .)

Applying Theorem 2.1 while choosing  $\tau_t$  as in (8), we have

$$\Delta_t \leq \Delta_{t-1} - \left(\frac{1}{2} \gamma \tau_{t-1}^2 \Delta_{t-1}^2\right)^{1/3} \quad (51)$$

$$= \Delta_{t-1} - \left((1-r)^3 \Delta'_{t-1} \Delta_{t-1}^2\right)^{1/3} \quad (52)$$

$$\leq \Delta_{t-1} - (1-r) \Delta_{t-1} \quad (53)$$

$$= r \Delta_{t-1}. \quad (54)$$

This completes our proof. □

## C. Alternative Proof and Generalized Version of Corollary 2.3

Corollary 2.3 immediately follows from Theorem 2.1. In this appendix, we present a simpler alternative proof. Furthermore, this proof leads to a more general constraint elimination rule. In particular, while Corollary 2.3 is assumed to be used with the BLITZ algorithm (and subproblems are assumed to be solved exactly), the more general rule can be applied with *any* feasible point  $\mathbf{y}$  and suboptimality gap  $\Delta$ .

Recall Corollary 2.3:

**Corollary 2.3** (Constraint Elimination). *For  $t \geq 1$ , define  $\Delta'_t$  as in (7). If*

$$\text{dist}(h_j, \mathbf{y}_t) > \sqrt{\frac{2}{\gamma} \Delta'_t}, \quad (10)$$

*then  $h_j(\mathbf{x}^*) < 0$ , and  $h_j$  may be eliminated from (P1).*

Here we prove the following:

**Theorem C.1** (FLEX Constraint Elimination). *For (P1), let  $\mathbf{y}$  be any feasible point and let  $\Delta$  be a suboptimality gap such that  $f(\mathbf{y}) - f(\mathbf{x}^*) \leq \Delta$ . If*

$$\text{dist}(h_j, \mathbf{y}) > \sqrt{\frac{2}{\gamma}} \Delta, \quad (55)$$

*then  $h_j(\mathbf{x}^*) < 0$ , and  $h_j$  may be eliminated from (P1).*

*Proof.* By optimality conditions of (P1), we know

$$\langle \nabla f(\mathbf{x}^*), \mathbf{y} - \mathbf{x}^* \rangle \geq 0. \quad (56)$$

By strong convexity of  $f$ , we have

$$f(\mathbf{y}) \geq f(\mathbf{x}^*) + \langle \nabla f(\mathbf{x}^*), \mathbf{y} - \mathbf{x}^* \rangle + \frac{\gamma}{2} \|\mathbf{y} - \mathbf{x}^*\|_2^2 \quad (57)$$

$$\geq f(\mathbf{x}^*) + \frac{\gamma}{2} \|\mathbf{y} - \mathbf{x}^*\|_2^2. \quad (58)$$

Assume  $\text{dist}(h_j, \mathbf{y}) > \sqrt{\frac{2}{\gamma}} \Delta$ . This implies

$$\|\mathbf{y} - \mathbf{x}^*\|_2^2 \leq \frac{2}{\gamma} [f(\mathbf{y}) - f(\mathbf{x}^*)] \quad (59)$$

$$\leq \frac{2}{\gamma} \Delta \quad (60)$$

$$< \text{dist}(h_j, \mathbf{y})^2. \quad (61)$$

We have shown  $\text{dist}(h_j, \mathbf{y}) > \|\mathbf{y} - \mathbf{x}^*\|_2$ . By definition of  $\text{dist}(h_j, \mathbf{y})$ , we must have  $h_j(\mathbf{x}^*) < 0$ . Therefore,  $h_j$  is not active at the solution.  $\square$

We note that in our experience, such screening/constraint elimination rules are rather conservative in general. This means that for many problems, few constraints are eliminated unless the problem is somehow easy to begin with (in our case, if the feasible point  $\mathbf{y}$  is already close to the solution  $\mathbf{x}^*$ ; in the  $\ell_1$ -regularized learning case, screening rules perform best when the regularization  $\lambda$  is large).

As a result, for hard problems, we find it much more efficient to be aggressive eliminating constraints and then periodically reconsider constraints later. When reconsidering constraint  $h_j$  in BLITZ, we compute  $\text{dist}(h_j, \mathbf{y})$  to determine whether  $h_j$  should be added to  $\mathcal{C}$ . With  $\text{dist}(h_j, \mathbf{y})$  already computed, applying Theorem C.1 requires negligible additional computation.

## D. Proof of Theorem 3.3

**Theorem 3.3** (Progress for  $\ell_1$  with Approximate Solver). *For (P5), define  $\Delta_t$  as in (16), and assume  $\mathbf{x}_t$  and  $\mathbf{w}_t$  satisfy (17). If  $\alpha_{t+1} = 1$ , assume  $g(\mathbf{w}_{t+1}) \geq g(\mathbf{w}_t)$ . If  $\alpha_{t+1} < 1$ , let  $h_j$  be the (possibly non-unique) constraint such that  $h_j(\mathbf{x}_t) > 0$  and  $h_j(\mathbf{y}_{t+1}) = 0$  and assume  $g(\mathbf{w}_{t+1}) \geq \max_{\delta} g(\mathbf{w}_t + \delta \mathbf{e}_j)$ . Then for  $t \geq 1$ , we have*

$$\Delta_{t+1} \leq \max \left\{ \Delta_t - \left( \frac{1}{2L} (1 - \epsilon_t)^2 \tau_t^2 \Delta_t^2 \right)^{1/3}, \epsilon_t \Delta_t \right\}. \quad (18)$$

This proof is similar to the proof of Theorem 2.1. The main addition is the incorporation of partial subproblem solutions. The relation between  $\mathbf{x}_t$  and  $\mathbf{w}_t$  as defined in (15) is important, and for this reason, our proof applies only to the  $\ell_1$ -regularized loss minimization problem and not the general setting of Theorem 2.1.

Like in the proof of Theorem 2.1, we use  $\alpha$  to refer to  $\alpha_{t+1}$ . Note that when  $\alpha = 1$ , we have

$$\Delta_{t+1} = f(\mathbf{y}_{t+1}) - g(\mathbf{w}_{t+1}) \quad (62)$$

$$= f(\mathbf{x}_t) - g(\mathbf{w}_{t+1}) \quad (63)$$

$$\leq f(\mathbf{x}_t) - g(\mathbf{w}_t) \quad (64)$$

$$\leq \epsilon_t (f(\mathbf{x}_t) - f(\mathbf{y}_t)) \quad (65)$$

$$= \epsilon_t \Delta_t. \quad (66)$$

Thus, when  $\alpha = 1$ , the theorem holds. For the remainder of the proof, we consider the case  $\alpha < 1$ . We write

$$\Delta_{t+1} = f(\mathbf{y}_{t+1}) - g(\mathbf{w}_{t+1}) \quad (67)$$

$$= f((1 - \alpha)\mathbf{y}_t + \alpha\mathbf{x}_t) - g(\mathbf{w}_{t+1}) \quad (68)$$

$$\leq (1 - \alpha)f(\mathbf{y}_t) + \alpha f(\mathbf{x}_t) - \frac{1}{2L}\alpha(1 - \alpha)\|\mathbf{x}_t - \mathbf{y}_t\|_2^2 \quad (69)$$

$$= (1 - \alpha)[f(\mathbf{y}_t) - g(\mathbf{w}_t)] + \alpha[f(\mathbf{x}_t) - g(\mathbf{w}_t)] + [g(\mathbf{w}_t) - g(\mathbf{w}_{t+1})] - \frac{1}{2L}\alpha(1 - \alpha)\|\mathbf{x}_t - \mathbf{y}_t\|_2^2 \quad (70)$$

$$\leq (1 - \alpha)\Delta_t + \alpha\epsilon_t\Delta_t + [g(\mathbf{w}_t) - g(\mathbf{w}_{t+1})] - \frac{1}{2L}\alpha(1 - \alpha)\|\mathbf{x}_t - \mathbf{y}_t\|_2^2 \quad (71)$$

$$= (1 - \alpha(1 - \epsilon_t))\Delta_t - \frac{1}{2L}\alpha(1 - \alpha)\|\mathbf{x}_t - \mathbf{y}_t\|_2^2 + [g(\mathbf{w}_t) - g(\mathbf{w}_{t+1})]. \quad (72)$$

The remaining steps of the proof bound the second and third terms of (72) as functions of  $\alpha$  and  $\tau_t$ . We then achieve the final result by bounding over all  $\alpha \in [0, 1]$ .

For the second term of (72), we have

$$\frac{1}{2L}\alpha(1 - \alpha)\|\mathbf{x}_t - \mathbf{y}_t\|_2^2 = \frac{1}{2L}\alpha(1 - \alpha) \left[ \frac{\|\mathbf{y}_{t+1} - \mathbf{y}_t\|_2^2}{\alpha^2} \right] \quad (73)$$

$$\geq \frac{1 - \alpha}{\alpha} \frac{1}{2L} \tau_t^2. \quad (74)$$

The inequality above results from the definition of  $\alpha$ , the condition  $\alpha < 1$ , and the definition of  $\tau_t$  ( $\|\mathbf{y}_{t+1} - \mathbf{y}_t\|_2$  must be at least  $\tau_t$ , otherwise  $\alpha$  must be 1).

Now let us consider the third term of (72). Recall that  $\mathbf{x}_t = \xi_t \cdot p(\mathbf{A}\mathbf{w}_t, \mathbf{b})$ , where  $p$  maps dual variables  $\mathbf{w}_t$  to the primal variables  $\mathbf{x}_t$  and  $\xi_t \in [0, 1]$  scales this result toward  $\mathbf{0}$  so that  $\mathbf{x}_t$  satisfies all constraints in  $\mathcal{C}_t$ . Since  $\alpha < 1$ , there must be an  $h_j$  such that  $h_j(\mathbf{x}_t) > 0$ ,  $h_j(\mathbf{y}_{t+1}) = 0$ , and  $h_j(\mathbf{x}_{t+1}) \leq 0$ . For this  $h_j$ , we have

$$h_j(\mathbf{y}_{t+1}) = 0 \quad (75)$$

$$\Rightarrow |\mathbf{A}_j^T \mathbf{y}_{t+1}| - \lambda = 0 \quad (76)$$

$$\Rightarrow |\mathbf{A}_j^T [\alpha\mathbf{x}_t + (1 - \alpha)\mathbf{y}_t]| - \lambda = 0 \quad (77)$$

$$\Rightarrow \alpha |\mathbf{A}_j^T \mathbf{x}_t| + (1 - \alpha) |\mathbf{A}_j^T \mathbf{y}_t| - \lambda \geq 0 \quad (78)$$

$$\Rightarrow |\mathbf{A}_j^T \mathbf{x}_t| - \lambda \geq \frac{(1 - \alpha)}{\alpha} (\lambda - |\mathbf{A}_j^T \mathbf{y}_t|) \quad (79)$$

$$\Rightarrow \frac{|\mathbf{A}_j^T \mathbf{x}_t| - \lambda}{\|\mathbf{A}_j\|_2} \geq \frac{(1 - \alpha)}{\alpha} \frac{\lambda - |\mathbf{A}_j^T \mathbf{y}_t|}{\|\mathbf{A}_j\|_2} \quad (80)$$

$$\Rightarrow \frac{|\mathbf{A}_j^T \mathbf{x}_t| - \lambda}{\|\mathbf{A}_j\|_2} \geq \frac{(1 - \alpha)}{\alpha} \tau_t. \quad (81)$$

Above we have used the fact that  $\text{dist}(h_j, \mathbf{y}_t) = \frac{\lambda - |\mathbf{A}_j^T \mathbf{y}_t|}{\|\mathbf{A}_j\|_2} \geq \tau_t$ . Otherwise,  $h_j$  would have been included in  $\mathcal{C}_t$ , making  $h_j(\mathbf{x}_t) \leq 0$ . Since  $\xi_t \in [0, 1]$  we have

$$\frac{|\mathbf{A}_j^T p(\mathbf{A}\mathbf{w}_t, \mathbf{b})| - \lambda}{\|\mathbf{A}_j\|_2} \geq \frac{(1 - \alpha)}{\alpha} \tau_t. \quad (82)$$

However,  $\mathbf{A}_j^T p(\mathbf{A}\mathbf{w}_t, \mathbf{b})$  is also the derivative of the loss  $\sum_i \phi_i(\mathbf{a}_i^T \mathbf{w})$  with respect to  $w_j$ . Using standard coordinate

descent analysis, if we consider minimizing  $-g(\mathbf{w})$  with an update at coordinate  $j$ , we have

$$g(\mathbf{w}_t) - g(\mathbf{w}_{t+1}) \leq \min_{\delta_j} g(\mathbf{w}_t) - g(\mathbf{w}_t + \mathbf{e}_j \delta) \quad (83)$$

$$\leq \min_{\delta} \frac{L}{2} \|\mathbf{A}_j\|_2^2 \delta^2 + [\mathbf{A}_j^T p(\mathbf{A} \mathbf{w}_t, \mathbf{b})] \delta + \lambda |\delta| \quad (84)$$

$$\leq -\frac{1}{2L} \left[ \frac{\lambda - |\mathbf{A}_j^T p(\mathbf{A} \mathbf{w}_t, \mathbf{b})|}{\|\mathbf{A}_j\|_2} \right]^2 \quad (85)$$

$$\leq -\frac{1}{2L} \frac{(1 - \alpha)^2}{\alpha^2} \tau_t^2. \quad (86)$$

Above, the second inequality comes from our assumption that  $\phi_i$  is smooth. Combining (86) and (74) with (72), we have

$$\Delta_{t+1} \leq (1 - \alpha(1 - \epsilon_t)) \Delta_t - \frac{(1 - \alpha)}{\alpha} \frac{1}{2L} \tau_t^2 - \frac{(1 - \alpha)^2}{\alpha^2} \frac{1}{2L} \tau_t^2 \quad (87)$$

$$= (1 - \alpha(1 - \epsilon_t)) \Delta_t - \frac{1 - \alpha}{\alpha^2} \frac{1}{2L} \tau_t^2 \quad (88)$$

$$= \epsilon_t \Delta_t + (1 - \alpha) \left( (1 - \epsilon_t) \Delta_t - \frac{1}{\alpha^2} \frac{1}{2L} \tau_t^2 \right). \quad (89)$$

We complete our proof by bounding over all  $\alpha \in [0, 1]$ . A relatively simple bound is the following:

$$\Delta_{t+1} \leq \epsilon_t \Delta_t + \max_{\alpha \in [0, 1]} \min \left\{ (1 - \alpha)(1 - \epsilon_t) \Delta_t, \left( (1 - \epsilon_t) \Delta_t - \frac{1}{\alpha^2} \frac{1}{2L} \tau_t^2 \right)_+ \right\} \quad (90)$$

$$= \max \left\{ \epsilon_t \Delta_t, \Delta_t - \left( \frac{1}{2L} (1 - \epsilon_t)^2 \tau_t^2 \Delta_t^2 \right)^{1/3} \right\}. \quad (91)$$

## E. Derivation of Dual Problem for $\ell_1$ -Regularized Loss Minimization

In this appendix, we derive the dual of the  $\ell_1$ -regularized learning problem from Section 3.

$$\min_{\mathbf{w}} \sum_{i=1}^n \phi_i(\mathbf{a}_i^T \mathbf{w}) + \lambda \|\mathbf{w}\|_1 = \min_{\mathbf{w}} \sum_{i=1}^n \phi_i^{**}(\mathbf{a}_i^T \mathbf{w}) + \lambda \|\mathbf{w}\|_1 \quad (92)$$

$$= \min_{\mathbf{w}} \sum_{i=1}^n \max_{x_i} [(\mathbf{a}_i^T \mathbf{w}) x_i - \phi_i^*(x_i)] + \lambda \|\mathbf{w}\|_1 \quad (93)$$

$$= \min_{\mathbf{w}} \max_{\mathbf{x}} - \sum_{i=1}^n \phi_i^*(x_i) + \langle \mathbf{A} \mathbf{w}, \mathbf{x} \rangle + \lambda \|\mathbf{w}\|_1 \quad (94)$$

$$= \max_{\mathbf{x}} \min_{\mathbf{w}} - \sum_{i=1}^n \phi_i^*(x_i) + \langle \mathbf{A} \mathbf{w}, \mathbf{x} \rangle + \lambda \|\mathbf{w}\|_1 \quad (95)$$

$$= \max_{\mathbf{x}} - \sum_{i=1}^n \phi_i^*(x_i) + \min_{\mathbf{w}} \langle \mathbf{A} \mathbf{w}, \mathbf{x} \rangle + \lambda \|\mathbf{w}\|_1 \quad (96)$$

$$= \max_{\mathbf{x}: \|\mathbf{A}^T \mathbf{x}\|_\infty \leq \lambda} \sum_{i=1}^n -\phi_i^*(x_i). \quad (97)$$

Note that  $\phi_i^*$  refers to the conjugate function of  $\phi_i$ :

$$\phi_i^*(x_i) = \max_v \langle v, x_i \rangle - f(v). \quad (98)$$

We now derive this function for squared and logistic loss.

### E.1. Conjugate Function for Squared Loss

$$\max_v \langle v, x_i \rangle - \frac{1}{2}(v - b_i)^2 = -\frac{1}{2}b_i^2 + \max_v (x_i + b_i)v - \frac{1}{2}v^2 \quad (99)$$

$$= -\frac{1}{2}b_i^2 + \frac{1}{2}(b_i + x_i)^2 \quad (100)$$

by setting  $v = x_i + b_i$ .

### E.2. Conjugate Function for Logistic Loss

We are looking to solve

$$\max_v \langle v, x_i \rangle - \log(1 + \exp(-b_i v)). \quad (101)$$

Differentiating, we have

$$x_i + \frac{b_i \exp(-b_i v)}{1 + \exp(-b_i v)} = 0 \quad (102)$$

$$\Rightarrow x_i = \frac{-b_i \exp(-b_i v)}{1 + \exp(-b_i v)} \quad (103)$$

$$\Rightarrow v = -\frac{1}{b_i} \log \left( \frac{-x_i}{x_i + b_i} \right). \quad (104)$$

We can substitute this into (101) to obtain

$$\phi^*(x_i) = -\frac{x_i}{b_i} \log \left( \frac{-x_i}{x_i + b_i} \right) - \log \left( 1 - \frac{x_i}{x_i + b_i} \right) \quad (105)$$

$$= -\frac{x_i}{b_i} \log \left( -\frac{x_i}{b_i} \right) + \frac{x_i}{b_i} \log \left( 1 + \frac{x_i}{b_i} \right) - \log \left( 1 - \frac{x_i}{x_i + b_i} \right) \quad (106)$$

$$= -\frac{x_i}{b_i} \log \left( -\frac{x_i}{b_i} \right) + \left( 1 + \frac{x_i}{b_i} \right) \log \left( 1 + \frac{x_i}{b_i} \right). \quad (107)$$

## F. Examples of Computing $\text{dist}(h_j, \mathbf{y})$

In this appendix, we briefly include examples for evaluating  $\text{dist}(h_j, \mathbf{y})$ .

### F.1. Linear Constraints

The most common scenario is that  $h_j$  is linear. For some vector  $\mathbf{a}$  and scalar  $b$ , let

$$h_j(\mathbf{x}) = \mathbf{a}^T \mathbf{x} + b. \quad (108)$$

In this case,

$$\text{dist}(h_j, \mathbf{y}) = \inf_{\mathbf{z}: h_j(\mathbf{z})=0} \|\mathbf{z} - \mathbf{y}\|_2 \quad (109)$$

$$= \|(\mathbf{y} + \mu \mathbf{a}) - \mathbf{y}\|_2 \quad (110)$$

$$= |\mu| \|\mathbf{a}\|_2, \quad (111)$$

where the scalar  $\mu$  is such that

$$h_j(\mathbf{y} + \mu \mathbf{a}) = \langle \mathbf{a}, \mathbf{y} \rangle + \mu \|\mathbf{a}\|_2^2 + b = 0. \quad (112)$$

This leaves us with

$$\text{dist}(h_j, \mathbf{y}) = \frac{|\langle \mathbf{a}, \mathbf{y} \rangle + b|}{\|\mathbf{a}\|_2}. \quad (113)$$

## F.2. Constraints for $\ell_1$ -Regularized Loss Minimization

When  $h_j(\mathbf{x}) = |\mathbf{A}_j^T \mathbf{x}| - \lambda$ , the constraint  $h_j$  can be viewed as the combination of two linear constraints:

$$h_j^+(\mathbf{x}) = \mathbf{A}_j^T \mathbf{x} - \lambda, \quad \text{and} \quad (114)$$

$$h_j^-(\mathbf{x}) = -\mathbf{A}_j^T \mathbf{x} - \lambda. \quad (115)$$

In the BLITZ algorithm, the fact  $\mathbf{y}$  is feasible implies  $|\mathbf{A}_j^T \mathbf{y}| \leq \lambda$  and we have

$$\text{dist}(h_j, \mathbf{y}) = \frac{\lambda - |\mathbf{A}_j^T \mathbf{y}|}{\|\mathbf{A}_j\|_2}. \quad (116)$$

## F.3. Spherical Constraints

$\text{dist}(h_j, \mathbf{y})$  is also easy to compute when  $\{\mathbf{x} : h_j(\mathbf{x}) = 0\}$  is a sphere. Specifically, let

$$h_j(\mathbf{x}) = a \|\mathbf{x} - \mathbf{b}\|_2^2 - c. \quad (117)$$

Assume  $a > 0$  and also assume that  $c \geq 0$  since  $h_j(\mathbf{x}) \leq 0$  could never be satisfied otherwise. The minimizer of  $\|\mathbf{z} - \mathbf{y}\|_2$  subject to  $h_j(\mathbf{z}) = 0$  is given by

$$\mathbf{z}^* = \mathbf{b} + \mu(\mathbf{y} - \mathbf{b}), \quad (118)$$

where  $\mu \geq 1$  is chosen such that  $h_j(\mathbf{z}^*) = 0$ . More specifically, we have

$$a\mu^2 \|\mathbf{y} - \mathbf{b}\|_2^2 - c = 0 \quad (119)$$

$$\Rightarrow \mu = \sqrt{\frac{c}{a \|\mathbf{y} - \mathbf{b}\|_2^2}}. \quad (120)$$

$$(121)$$

This implies

$$\|\mathbf{z}^* - \mathbf{y}\|_2 = \|(\mu - 1)(\mathbf{b} - \mathbf{y})\|_2 \quad (122)$$

$$= (\mu - 1) \|\mathbf{y} - \mathbf{b}\|_2 \quad (123)$$

$$= \sqrt{\frac{c}{a}} \|\mathbf{y} - \mathbf{b}\|_2. \quad (124)$$

## F.4. Smooth Constraints

For arbitrary  $h_j$ , evaluating  $\text{dist}(h_j, \mathbf{y})$  is potentially difficult. Despite  $h_j$  being convex, minimizing  $\|\mathbf{z} - \mathbf{y}\|_2$  subject to  $h_j(\mathbf{z}) = 0$  is not a convex problem in general due to the domain  $\{\mathbf{z} : h_j(\mathbf{z}) = 0\}$ .

The guarantees of BLITZ still hold, however, if we use a lower bound of  $\text{dist}(h_j, \mathbf{y})$  when determining the working set. If the gradient of  $h_j$  exists and is Lipschitz continuous with constant  $L$ , then obtaining a lower bound is straightforward. We can define

$$h'_j(\mathbf{x}) = h_j(\mathbf{y}) + (\mathbf{x} - \mathbf{y})^T \nabla h_j(\mathbf{y}) + \frac{L}{2} \|\mathbf{x} - \mathbf{y}\|_2^2. \quad (125)$$

$h'_j(\mathbf{x})$  upper-bounds  $h_j(\mathbf{x})$  for all  $\mathbf{x}$ . As a result, the set  $\{\mathbf{x} : h'_j(\mathbf{x}) \leq 0\}$  is a subset of  $\{\mathbf{x} : h_j(\mathbf{x}) \leq 0\}$ , and we have

$$\text{dist}(h'_j, \mathbf{y}) \leq \text{dist}(h_j, \mathbf{y}). \quad (126)$$

Evaluating  $\text{dist}(h'_j, \mathbf{y})$  is straightforward since  $\{\mathbf{x} : h'_j(\mathbf{x}) = 0\}$  is a sphere.



**G. Remarks on Computing  $\alpha$** 

Here we briefly discuss how to compute  $\alpha$ . Recall that

$$\alpha = \max \{ \alpha' \in [0, 1] : \alpha' \mathbf{x} + (1 - \alpha') \mathbf{y} \in \mathcal{D} \} . \quad (127)$$

That is,  $\alpha$  is chosen such that  $\mathbf{y} = \alpha \mathbf{x} + (1 - \alpha) \mathbf{y}$  is the closest feasible point to  $\mathbf{x}$  on the line segment  $[\mathbf{y}, \mathbf{x}]$ .

One way to find  $\alpha$  is to define an  $\alpha_j$  for each constraint  $h_j$  as

$$\alpha_j = \max \{ \alpha' \in [0, 1] : h_j(\alpha' \mathbf{x} + (1 - \alpha') \mathbf{y}) \leq 0 \} . \quad (128)$$

Then we simply set

$$\alpha = \min_j \alpha_j . \quad (129)$$

If  $h_j(\mathbf{x}) \leq 0$ , then clearly  $\alpha_j = 1$ . Otherwise, for general  $h_j$ , evaluating (128) can be accomplished in logarithmic time using the bisection algorithm. For the common case that  $h_j$  is linear,  $\alpha_j$  can be computed in closed form:

$$h_j(\alpha_j \mathbf{x} + (1 - \alpha_j) \mathbf{y}) = 0 \quad (130)$$

$$\Rightarrow \alpha_j h_j(\mathbf{x}) + (1 - \alpha_j) h_j(\mathbf{y}) = 0 \quad (131)$$

$$\Rightarrow \alpha_j = \frac{-h_j(\mathbf{y})}{h_j(\mathbf{x}) - h_j(\mathbf{y})} . \quad (132)$$

Note that in BLITZ,  $h_j(\mathbf{y}) \leq 0$ , and since any constraint for which  $h_j(\mathbf{y}) = 0$  is included in  $\mathcal{C}$ , it is always the case that  $\alpha_j > 0$ .
