# Supplementary material
Source: ML conference proceedings conference paper supplement (https://proceedings.mlr.press/v37/johnson15.html)
Supplement: Supplementary file 2 [file johnson15-supp.zip]

Archive with 5 entries (2 files):
- blitz supplement/
- blitz supplement/blitz appendices.pdf
- __MACOSX/
- __MACOSX/blitz supplement/
- __MACOSX/blitz supplement/._blitz appendices.pdf
